# Supplementary material for: Fertility-Sparing Surgery in Gynecologic Cancer: A Systematic Review
Source: Cancers (Basel). 2021 Feb 28;13(5):1008. doi: 10.3390/cancers13051008 (PMC7975326; doi:10.3390/cancers13051008)
Supplement: Supplementary file 1 [file cancers-13-01008-s001.xlsx]

## Sheet: Table S1 Search string
Table S1. Search string
Medline (Ovid)	Search
#1	((uter* or cervic* or cervix or endometr* or ovar*) adj3 (cancer* or carcino* or adenocarcinoma* or malign*)).ti,ab.
#2	endometrial neoplasms/ or uterine cervical neoplasms/ or exp Ovarian Neoplasms/
#3	1 or 2
#4	*Fertility Preservation/ or *Conization/ or *Trachelectomy/
#5	((preserv* or sparing or conserving or conservation) adj3 (fertil* or ovar* or uter* or reproduct*)).ti,ab.
#6	trachelect*.ti,ab.
#7	4 or 5 or 6
#8	3 and 7
#9	limit 8 to (dutch or english or french or german)
Embase	Search
#1	((uter* or cervic* or cervix or endometr* or ovar*) adj3 (cancer* or carcino* or adenocarcinoma* or malign*)).ti,ab.
#2	endometrium tumor/ or uterine cervix tumor/ or exp ovarian cancer/
#3	1 or 2
#4	*fertility preservation/ or *uterine cervix conization/ or *cervicectomy/
#5	((preserv* or sparing or conserving or conservation) adj3 (fertil* or ovar* or uter* or reproduct*)).ti,ab.
#6	trachelect*.ti,ab.
#7	6 or 4 or 5
#8	3 and 7
#9	limit 8 to (dutch or english or french or german)
Cochrane Library	Search
#1	((uter* OR cervic* OR cervix OR endometr* OR ovar*) NEAR/3 (cancer* OR carcino* OR adenocarcinoma* OR malign*)):ab,ti
#2	((preserv* OR sparing OR conserving OR conservation) NEAR/3 (fertil* OR ovar* OR uter* OR reproduct*)):ab,ti
#3	trachelect*:ab,ti
#4	#2 OR #3
#5	#1 AND #4

## Sheet: Table S2 QA Cervix
Table S2. Newcastle-Ottawa quality assessment scale of included studies on cervical cancer
Study	Selection				Comparability	Outcome			Score
	Representativeness	Selection non-	Ascertainment	Outcome not present	Comparability	Assessment	Follow-up^	Adequacy of
	of exposed cohort	exposed cohort	of exposure	at start of study	of cohorts	of outcome		follow-up~
Abu, 2010 [18]	*	–	*	*	–	*	–	*	5
Ayhan, 2019 [19]	*	–	*	–	–	*	*	*	5
Balaya, 2019 [20]	*	–	*	*	–	*	*	*	6
Beiner, 2008 [21]	*	*	*	*	**	*	*	*	9
Bekkers, 2002 [22]	*	–	*	–	–	*	*	*	5
Bernardini, 2003 [23]	*	–	*	*	–	*	–	*	5
Biliatis, 2012 [24]	*	*	*	*	–	*	*	*	7
Bisseling, 2007 [25]	*	*	*	–	–	*	*	*	6
Bogani, 2019 [26]	*	–	*	*	–	*	*	*	6
Bratila, 2016 [27]	*	–	*	–	–	*	*	*	5
Cao, 2013 [8]	*	–	*	*	–	*	*	*	6
Capilna, 2014 [28]	*	–	*	–	–	*	–	*	4
Chernyshova, 2020 [29]	*	–	*	*	–	*	*	*	6
Choi, 2014 [30]	*	–	*	–	–	*	*	*	5
Cui, 2018 [31]	*	*	*	–	*	*	*	*	7
Dargent, 2000 [32]	*	–	*	–	–	*	*	*	5
Deng, 2017 [33]	*	–	*	*	–	*	*	*	6
Diaz, 2008 [34]	*	*	*	–	*	**	–	*	7
Du, 2011 [35]	*	–	*	–	–	*	*	*	5
Ebisawa, 2013 [36]	*	–	*	–	–	*	*	*	5
Fanfani, 2014 [37]	*	–	*	–	–	*	*	*	5
Gent, 2014 [38]	*	*	*	–	*	*	*	*	7
Gil-Ibanez, 2020 [39]	*	–	*	*	–	*	*	*	6
Guo, 2019 [40]	*	*	*	–	*	*	*	*	7
Hauerberg, 2015 [41]	*	–	*	*	–	*	*	*	6
He, 2014 [42]	*	*	*	–	*	*	–	*	6
Helpman, 2011 [43]	*	*	*	*	*	*	*	*	8
Hertel, 2006 [44]	*	–	*	*	–	*	*	*	6
Johansen, 2016 [45]	*	–	*	*	–	*	*	*	6
Kasuga, 2016 [46]	*	–	*	–	–	*	–	*	5
Kim, 2010 [47]	*	–	*	–	–	*	*	*	5
Kim, 2012 [48]	*	–	*	–	–	*	*	*	5
Kim, 2016 [49]	*	*	*	–	*	*	–	*	6
Kim, 2012 [50]	*	–	*	–	–	*	–	*	4
Lanowska, 2014 [51]	*	–	*	–	–	*	*	*	5
Lee, 2009 [52]	*	–	*	–	–	*	*	*	5
Lee, 2009 [53]	*	*	*	–	*	*	*	*	7
Lee, 2020 [54]	*	–	*	–	–	*	*	*	5
Li, 2011 [55]	*	–	*	–	–	*	–	*	4
Li, 2019 [56]	*	–	*	–	–	*	*	*	5
Li, 2020 [57]	*	–	*	–	–	*	*	*	5
Lindsay, 2014 [58]	*	–	*	–	–	*	*	*	5
Lintner, 2013 [59]	*	–	*	–	–	*	*	*	5
Lu, 2019 [60]	*	*	*	–	*	*	*	*	7
Ma, 2014 [61]	*	–	*	–	–	*	*	*	5
Machida, 2020 [62]	*	–	*	–	–	*	*	*	5
Machida, 2018 [63]	*	*	*	–	**	*	*	*	8
Malmsten, 2019 [64]	*	–	*	–	–	*	*	*	5
Maneo, 2011 [65]	*	–	*	–	–	*	*	*	5
Maneo, 2008 [66]	*	*	*	–	*	*	*	*	7
Mangler, 2014 [67]	*	–	*	–	–	*	*	*	5
Marchiole, 2007 [68]	*	*	*	–	*	*	*	*	7
Matsuo, 2019 [69]	*	–	*	–	–	*	*	*	5
Matsuo, 2018 [70]	*	*	*	–	*	*	*	*	7
Muraji, 2012 [71]	*	–	*	–	–	*	*	*	5
Nakajima, 2020 [72]	*	–	*	–	–	*	*	*	5
Nick, 2012 [73]	*	–	*	–	–	*	–	*	4
Nishio, 2013 [74]	*	–	*	–	–	*	*	*	5
Okugawa, 2020 [75]	*	–	*	–	–	*	*	*	5
Park, 2014 [76]	*	–	*	–	–	*	*	*	5
Park, 2014 [77]	*	–	*	–	–	*	*	*	5
Plante, 2011 [78]	*	–	*	–	–	*	*	*	5
Plante, 2020 [79]	*	–	*	–	–	*	*	*	5
Raju, 2012 [80]	*	–	*	–	–	*	*	*	5
Renaud, 2000 [81]	*	*	*	–	*	*	*	*	7
Rendon, 2020 [82]	*	–	*	–	–	*	*	*	5
Rob, 2008 [83]	*	–	*	–	–	*	*	*	5
Robova, 2014 [84]	*	–	*	–	–	*	*	*	5
Saadi, 2017 [85]	*	–	*	–	–	*	*	*	5
Saso, 2012 [86]	*	–	*	–	–	*	*	*	5
Shah, 2019 [87]	*	–	*	–	–	*	*	*	5
Shepherd, 2009 [88]	*	–	*	–	–	*	*	*	5
Shinkai, 2020 [89]	*	–	*	–	–	*	*	*	5
Slama, 2016 [90]	*	–	*	–	–	*	*	*	5
Sonoda , 2008 [91]	*	–	*	–	–	*	–	*	5
Sopracordevole, 2014 [92]	*	–	*	–	–	*	*	*	5
Speiser, 2011 [93]	*	–	*	*	–	*	–	*	5
Spoozak, 2012 [94]	*	*	*	–	*	*	*	*	7
Tamauchi, 2016 [95]	*	–	*	–	–	*	*	*	5
Testa, 2013 [96]	*	–	*	–	–	*	*	*	5
Tokunaga, 2015 [97]	*	–	*	*	–	*	*	*	6
Tomao, 2017 [98]	*	–	*	–	–	*	*	*	5
Tseng, 2018 [99]	*	*	*	–	*	*	*	*	7
Uzan, 2013 [100]	*	–	*	–	–	*	*	*	5
Vieira, 2015 [101]	*	–	*	–	–	*	*	*	5
Wang, 2019 [102]	*	–	*	–	–	*	*	*	5
Wang, 2020 [103]	*	–	*	–	–	*	*	*	5
Wethington, 2012 [104]	*	–	*	–	–	*	*	*	5
Wright, 2010 [105]	*	–	*	–	–	*	*	*	5
Yan, 2016 [106]	*	–	*	*	-	*	*	*	6
Yoon, 2015 [107]	*	–	*	–	–	*	*	*	5
Yoshino, 2020 [108]	*	*	*	–	*	*	*	*	7
Zhang, 2015 [109]	*	–	*	–	–	*	–	*	4
Zhang, 2014 [110]	*	*	*	–	*	*	–	*	6
Zusterzeel, 2016 [111]	*	–	*	–	–	*	*	*	5
* fulfilled criteria for this item; – not fulfilled criteria for this item
^median follow-up of ≥24 months; ~lost to follow-up ≤10%; Studies with a total score of ≥5 were included for analysis.

## Sheet: Table S3 QA Ovarium
Table S3. Newcastle-Ottawa quality assessment scale of included studies on epithelial ovarian cancer
Study	Selection				Comparability	Outcome			Score
	Representativeness	Selection non-	Ascertainment	Outcome not present	Comparability	Assessment	Follow-up^	Adequacy of
	of exposed cohort	exposed cohort	of exposure	at start of study	of cohorts	of outcome		follow-up~
Baek, 2020 [112]	*	–	*	–	–	*	*	*	5
Chen, 2020 [113]	*	*	*	–	**	*	*	*	8
Colombo, 2005 [114]	*	–	–	–	–	–	–	–	1
Crafton, 2020 [115]	*	*	*	–	**	*	*	*	8
Ditto, 2015 [116]	*	*	*	–	**	*	*	*	8
Fakhr, 2013 [117]	–	–	*	–	–	*	*	*	4
Fruscio, 2016 [118]	*	*	*	–	**	*	*	*	8
Ghezzi, 2016 [119]	*	–	*	–	–	*	*	*	5
Gouy, 2018 [120]	*	–	*	–	–	*	*	*	5
Hu, 2011 [121]	*	–	*	–	–	*	*	–	4
Jiang, 2017 [122]	*	*	*	–	**	*	*	*	8
Johansen, 2020 [123]	*	*	*	–	*	*	*	*	7
Kajiyama, 2019 [124]	*	*	*	–	**	*	*	*	8
Kwon, 2009 [125]	*	–	*	–	–	*	*	*	5
Lee, 2015 [126]	*	*	*	–	**	*	*	*	8
Morice, 2005 [127]	*	–	*	–	–	*	*	*	5
Mueller, 2018 [128]	*	*	*	–	*	*	*	*	7
Nasioudis, 2020 [129]	*	*	*	–	**	*	*	*	8
Park, 2008 [130]	*	–	*	–	–	*	*	*	5
Park, 2016 [131]	*	*	*	–	–	*	*	*	6
Ratanasrithong, 2017 [132]	*	–	*	–	–	*	*	*	5
Satoh, 2010 [133]	*	–	*	–	–	*	*	*	5
Schilder, 2002 [134]	*	–	*	–	–	*	*	*	5
Schlaerth, 2009 [135]	*	*	*	–	*	*	*	*	7
Watanabe, 2020 [136]	*	–	*	–	–	*	*	*	5
Yin, 2019 [137]	*	–	*	–	–	*	*	*	5
Yoshihara, 2019 [138]	*	*	*	–	**	*	*	–	7
* fulfilled criteria for this item; – not fulfilled criteria for this item
^median follow-up of ≥24 months; ~lost to follow-up ≤10%; Studies with a total score of ≥5 were included for analysis.

## Sheet: Table S4 QA Endometrium
Table S4. Newcastle-Ottawa quality assessment scale of included studies on endometrial cancer
Study	Selection				Comparability	Outcome			Score
	Representativeness	Selection non-	Ascertainment	Outcome not present	Comparability	Assessment	Follow-up^	Adequacy of
	of exposed cohort	exposed cohort	of exposure	at start of study	of cohorts	of outcome		follow-up~
Ayhan, 2020 [139]	*	–	*	–	–	*	*	*	5
Casadio, 2020 [140]	*	–	*	–	–	*	*	*	5
Chae, 2019 [141]	*	–	*	–	–	*	–	*	4
Chen, 2016 [142]	*	–	*	–	–	*	*	*	5
Chung, 2020 [143]	*	–	*	*	–	*	*	*	6
Dursun, 2012 [144]	*	–	*	–	–	*	*	*	5
Eftekhar, 2009 [145]	*	–	*	*	–	*	*	*	6
Falcone, 2017 [146]	*	–	*	*	–	*	*	*	6
Falcone, 2020 [147]	*	–	*	–	–	*	*	*	5
Fujiwara, 2012 [148]	*	–	*	–	–	*	*	*	5
Greenwald, 2017 [149]	*	*	*	–	–	–	*	*	5
Hahn, 2009 [150]	*	–	*	–	–	*	*	*	5
Harrison, 2019 [151]	–	–	*	–	–	*	*	–	3
Kim, 2019 [152]	*	–	*	*	–	*	–	–	4
Laurelli, 2016 [153]	*	–	*	*	–	*	*	*	6
Mitsuhashi, 2019 [154]	*	–	*	–	–	*	*	*	5
Park, 2013 [14]	*	–	*	–	–	*	*	*	5
Park, 2013 [155]	*	–	*	–	–	*	*	*	5
Park, 2013 [156]	*	–	*	–	–	*	*	*	5
Perri, 2011 [157]	*	–	*	–	–	*	*	*	5
Pronin, 2015 [158]	*	–	*	*	–	*	–	*	5
Sato, 2016 [159]	*	–	*	–	–	*	–	*	4
Son, 2020 [160]	*	–	–	–	–	*	–	*	4
Ushijima, 2007 [161]	*	–	*	*	–	*	*	*	6
Wang, 2014 [162]	*	–	*	–	–	*	*	*	5
Wheeler, 2007 [163]	*	–	*	–	–	*	–	*	4
Xu, 2020 [164]	*	–	*	–	–	*	–	*	4
Yamagami, 2018 [165]	*	–	*	–	–	*	*	*	5
Yang, 2019 [166]	*	–	*	–	–	*	–	*	4
Yang, 2020 [167]	*	–	*	*	–	*	*	*	6
Yang, 2015 [168]	*	–	*	–	–	*	*	*	5
* fulfilled criteria for this item; – not fulfilled criteria for this item
^median follow-up of ≥24 months; ~lost to follow-up ≤10%; Studies with a total score of ≥5 were included for analysis.

## Sheet: Table S5 CKC-SVT
Table S5. Literature review of LLETZ, conisation or simple trachelectomy in patients with cervical cancer
Study	Design	n of patients		Modality	Age (y)	FIGO stage§	Histological	LVSI	(Neo)adjuvant	Oncological outcome	Reproductive outcome
		scheduled	underwent	of surgery	median	(tumor size)	subtype	positive	treatment	(median follow-up)
		for FSS	FSS		(range)
Bekkers, 2002	Retrospective	22	22	LLETZ	34	IA1	SCC	3	2 hysterectomy	0 recurrences, 0 DOD	NR
[22]		24	24	CKC				2	2 hysterectomy	0 recurrences, 0 DOD
										(72 months)
Biliatis, 2012*	Retrospective	35	34	LLETZ + LND	32	IB1 (<2cm)	49 SCC, 11 AC,	4	1 hysterectomy	0 reccurences, 0 DOD	7 pregnancies: 7 TD
[24]					(26-43)		2 ASCC			(56 months)
Bisseling, 2007	Retrospective	14	14	Cone	NR	29 IA1, 9 IA2	36 AC, 1 ASC,	4	–	0 recurrences, 0 DOD	18 pregnancies in 11 patients:
[25]		4	4	Cone + LND	(25-48)		1 other			(72 months)	3 loss, 2 terminations,
											13 live births
Bogani, 2019	Retrospective	32	32	Laser cone + LND	32	9 IA2, 21 IB1,	20 SCC, 11 AC,	14	3 CT + hysterectomy,	2 recurrences, 1 DOD	11 pregnancies in 11 patients
[26]					(26-40)	2 IB2	1 ASCC		1 CRT, 2 hysterectomy	(75 months)	(of 16 attempting): 2 loss, 1 PTD,
						(FIGO 2018)					8 TD
Choi, 2014	Retrospective	21	21	LLETZ/CKC	31	10 IA1, 1 IA2,	17 SCC, 2 ACC,	5	–	1 recurrence (AC), 0 DOD	11 pregnancies in 10 patients
[30]				+PTD	(22-43)	9 IB1, 1 IIA1	2 other			(53 months)	(of 13 attempting): 3 loss, 3 PTD,
						(<4cm)					5 TD
Fanfani, 2014	Retrospective	23	23	CKC + LND	30	7 IA2, 16 IB1	11 SCC, 11 AC,	NR	4 NACT, 1 CT	0 recurrence, 0 DOD	6 pregnancies in 6 patients
[37]					(24-43)	(<2cm)	1 other			(40 months)	(of 10 attempting): 1 PTD, 5 TD
Gil-Ibanez, 2020*	Retrospective	7	5	ST + LND	34	2 IA1+LVSI,	20 SCC, 14 AC	4	–	4 recurrences (2 AC,	22 pregnancies in 12 patients
[39]					(22-44)	5 IA2				3 LVSI-, 3 IB1, 1 IA2), 0 DOD	(of 30 attempting): 11 loss,
										(73 months)	5 PTD, 6 TD
He, 2014	Retrospective	25	25	CKC	34	IA1	SCC	5	2 re-CKC	0 recurrences, 0 DOD	NR
[42]										(12 months)
Lee, 2009	Retrospective	85	85	ESC	36	IA1	SCC	No	–	1 recurrence, 0 DOD	11 pregnancies in 9 patients:
[52]					(25-67)					(81 monhts)	1 loss, 10 TD
Lee, 2020	Retrospective	16	16	LLETZ	32	12 IA1, 20 IB1	27 SCC, 5 AC	No	1 CT	4 recurrences (4 IB1, 4 SCC,	14 pregnancies 11 patients:
[54]		6	6	CKC +/- LND	(24-42)	(median 13mm)				2 LVSI+), 0 DOD	2 loss, 1 termination,
										(49 months)	11 live births
Lee, 2009	Retrospective	22	22	LLETZ	35	IA1	SCC	9	13 re-CKC	0 recurrences, 0 DOD	2 pregnancies in 2 patients:
[53]					(25-67)					(37 months)	2 TD
Li, 2020	Retrospective	40	39	ESC + LND	32	5 IA1+LVSI, 21 IA2,	35 SCC, 3 AC,	15	–	1 recurrence (IA2, SCC,	4 pregnancies in 4 patients
[57]					(21-41)	14 IB1 (<2cm)	2 ASCC			LVSI-), 0 DOD	(of 17 attempting): 3 TD,
										(35 months)	1 ongoing
Lindsay, 2014	Retrospective	43	40	LLETZ + LND	29	2 IA1+LVSI, 4 IA2,	28 SCC, 11 AC,	16	3 re-LLETZ	2 recurrences (1 IA2, 1 IB1)	21 pregnancies in 16 patients:
[58]					(22-38)	38 IB1	4 ASCC			0 DOD	1 loss, 1 termination, 4 PTD,
										(42 months)	11 TD, 4 ongoing
Maneo, 2008	Retrospective	21	16	CKC + LND	30	IB1	9 SCC, 12 AC	1	All NACT, 2 RT	0 recurrences, 0 DOD	10 pregnancies in 6 patients
[66]					(17-39)	(median 15 mm)				(69 months)	(of 9 attempting): 1 loss, 2 PTD,
											7 TD
Maneo, 2011	Retrospective	37	36	CKC/LLETZ/laser	31	IB1 (<2cm)	24 SCC, 12 AC	5	–	1 (SCC, LVSI+), 1 DOD	21 pregnancies in 17 patients:
[65]				conisation + LND	(24-40)					(66 months)	5 loss, 1 termination, 3 PTD,
											10 TD, 1 ongoing
Okugawa, 2020	Retrospective	11	11	SAT + LND	33	10 IA1, 1 IB1	4 SCC, 9 AC,	NR	–	0 recurrences, 0 DOD	NR
[75]					(21-42)		1 ASCC			(80 months)
Plante, 2020	Retrospective	42	42	ST + LND	29	11 IA1+LVSI, 13 IA2,	26 SCC, 20 AC,	15	1 re-trachelectomy,	1 recurrence (SCC, LVSI+),	40 pregnancies in 27 patients:
[79]		8	8	Cone + LND	(21-44)	26 IB1 (<2cm)	4 other		1 CT	1 DOD	6 loss, 3 PTD, 30 TD, 1 ongoing
										(76 months)
Raju, 2012	Retrospective	15	15	ST + LND	28	5 IA2, 10 IB1	9 SCC, 6 AC	0	–	0 recurrences, 0 DOD	21 pregnancies in 15 patients
[80]					(20-40)	(median 8 mm)				(96 months)	(of 24 attempting): 3 loss, 18 TD
Rendon, 2020*	Retrospective	5	5	Cone	27	17 IB1, 7 IB2, 1 IIA1	23 SCC, 2 AC	NR	all NACT, 1 CT, 1 RH	0 recurrences, 0 DOD (ART)	13 pregnancies in 10 patients
[82]					(20-37)	(>2cm)				2 recurrences, 0 DOD (LRT)	(of 23 attempting): 1 loss, 7 PTD,
										1 recurrence, 0 DOD (CKC)	4 TD, 1 ongoing
										(47 months)
Rob, 2008	Retrospective	40	34	Cone / ST	28	3 IA1+LVSI, 10 IA2,	32 SCC, 7 AC,	17	all LND, 9 NACT	1 recurrence, 0 DOD	23 pregnancies in 17 patients
[83]						27 IB1 (<2cm)	1 ASCC			(47 months)	(of 24 attempting): 6 loss, 2 term-
											inations, 3 PTD, 9 TD, 3 ongoing
Robova, 2014	Retrospective	28	26	ST + LND	29	21 IB1, 7 IB2	15 SCC, 13 AC	11	all NACT, 6 RH	4 recurrences (2 SCC IB1	13 pregnancies in 11 patients
[84]					(15-34)	(>2cm)				LVSI+, 1 AC IB1, 1 AC IB2),	(of 20 attempting): 3 loss,
										2 DOD (42 months)	4 PTD, 6 TD
Slama, 2016	Retrospective	44	11	ST + LND	31	7 IA2, 23 IB1, 2 IB2	26 SCC, 4 AC,	6	9 NACT (>2cm or >2/3	4 recurrences (3 SCC, 1 AC,	6 pregnancies in 6 patients
[90]			21	Needle conus	(19-36)		2 ASCC		cervical stroma)	3 >2cm, 4 IB1, 2 LVSI+),	(of 9 attempting): 1 loss,
										0 DOD (23 months)	1 PTD, 4 TD
Sopracordevole,	Retrospective	132	132	Cone	44	123 IA1, 9 IA2	145 SCC, 7 AC,	2	–	0 recurrences; 0 DOD	NR
2014 [92]					(25-78)	(median 3 mm)	1 ASCC			(185 months)
Spoozak, 2012	Retrospective	966	966	Cone +/- LND	460 <40y	554 IA1, 434 IA2	784 SCC, 182 AC	NR	NR	similar survival for CKC	NR
[94]					425 41-65y					and hysterectomy
					81 >65y					(80 months)
Tomao, 2017	Retrospective	54	54	CKC or laser cone	32	13 IA2, 41 IB1	33 SCC, 19 AC,	12	1 NACT, 11 CT	7 recurrences (2 IA2, 5 IB1,	20 pregnancies in 17 patients
[98]				+ LND	(23-40)	(<2cm)	2 ASCC			4 SCC, 2 AC, 1 ASCC,	(of 25 attempting): 2 loss,
										2 LVSI+), 1 DOD	19 live births (1 twin)
										(55 months)
Tseng, 2018*	Retrospective	36	36	Cone	33	IB1	79 SCC, 38 AC,	NR	22 RT	93% 5y DSS	NR
[99]					(17-44)		8 ASCC			96.8*% 5y DSS <2cm
										82.4% 5y DSS >2cm
Wang, 2019*	Retrospective	11	11	ST + LND	32	26 IA1, 1 IA2,	78 SCC, 5 AC	NR	17 NACT, 5 CT	1 recurrence , 0 DOD	58 pregnancies in 54 patients
[102]					(± 5)	46 IB1				(36.2 months)	(of 69 attempting): 4 loss,
											4 terminations, 8 PTD, 42 TD
Wang, 2020	Retrospective	103	28	CKC / ESC	40 (24-71)	IA1	76 SCC, 27 AC	NR	72 hysterectomy, 1 RT,	3 recurrences (3 SCC),	3 pregnancies (of 5 patients
[103]									1 CT, 1 hysterectomy + RT	0 DOD	attempting): 2 PTD, 1 TD
										(37 months)
Wright, 2010	Retrospective	568	568	Cone	220 <30y	IA1	SCC	NR	NR	98% 5y OS	NR
[105]					226 30-35y					(60 months)
					122 >35y
FSS fertility-sparing surgery; LVSI lymph-vascular space invasion; ST simple trachelectomy; SAT simple abdominal trachelectomy; LLETZ large loop excision of the transformation zone; CKC cold knife conisation; ESC elektro-surgical conisation;
LND lymph node dissection; SCC squamous cell carcinoma; AC adenocarcinoma; ASCC adenosquamous cell carcinoma; NACT neoadjuvant chemotherapy; AT adjuvant treatment; CT chemotherapy; RT radiotherapy; CRT chemoradiation therapy;
RH radical hysterectomy; DOD died of disease; TD term delivery; PTD preterm delivery; NR not reported; ± standard deviation; § International Federation of Gynecology and Obstetrics (FIGO) 2009 (or 2018 if stated in table) staging for cervical cancer;
*Data (FIGO, histological subtype, LVSI, adjuvant treatment, oncological outcome, reproductive outcome) includes also patients who underwent abdominal or vaginal radical trachelectomy.

## Sheet: Table S6 VRT
Table S6. Literature review of vaginal radical trachelectomy in patients with cervical cancer
Study	Design	n of patients		Modality	Age (y)	FIGO stage§	Histological	LVSI	(Neo)adjuvant	Oncological outcome	Reproductive outcome
		scheduled	underwent	of surgery	median	(tumor size)	subtype	positive	treatment	(median follow-up)
		for FSS	FSS		(range)
Abu, 2010*	Retrospective	47	47	VRT	32	10 IA1+LVSI, 9 IA2,	42 SCC, 54 AC	38	27 RT or	1 recurrence, 1 DOD	20 pregnancies in 18 patients:
[18]	(prospectively				(6-45)	79 IB1			hysterectomy		4 loss, 3 terminations, 14 live
	collected data)										births, 2 ongoing
Balaya, 2019	Retrospective	45	45	VRT	32	2 IA1+LVSI, 6 IA2,	31 SCC, 17 AC,	9	NR	3 recurrences (3 <2cm), 0 DOD	NR
[20]		4	4	LRT	(22-46)	41 IB1	1 ASCC			(46 months)
						(45 <2cm, 4 >2cm)
Beiner, 2008	Retrospective	90	90	VRT	31	IA-IB (<2cm)	39 SCC, 44 AC,	61	1 RT	5 recurrences (margins >5mm),	NR
[21]					(20-44)		6 ASCC, 1 other			3 DOD
										(72 months)
Bernardini, 2003	Retrospective	80	80	VRT	NR	NR	NR	NR	NR	NR	22 pregnancies in 18 patients
[23]											(of 39 attempting): 3 loss , 7 PTD,
											12 TD
Bratila, 2016	Retrospective	36	32	VRT	33	4 IA1+LVSI, 13 IA2,	34 SCC, 2 AC	11	1 RT	0 recurrences, 0 DOD	7 pregnancies in 7 patients
[27]					(24-40)	19 IB1 (<4cm)				(42 months)	(of 28 attempting): 2 loss, 5 TD
Cao, 2013	Retrospective	77	77	VRT	30	13 IA1+LVSI, 9 IA2,	71 SCC, 6 AC	4	4 NACT (>2cm), 4 CT	7 recurrences (5 >2cm),	21 pregnancies in 17 patients
[8]	(prospectively				(18-38)	55 IB1				2 DOD	(of 43 attempting): 5 loss,
	collected data)									(34 months)	5 terminations, 4 PTD, 7 TD
Dargent, 2000	Retrospective	47	47	VRT	19 20-29y	5 pIA1, 13 pIA2, 25	39 SCC, 3 AC,	13	2 RT	2 recurrences (1 AC 2cm,	25 pregnancies (in 25 patients
[32]					23 30-39y	pIB, 1 pIIA2, 3 pIIB	4 ASCC, 1 other			1 SCC 2.5cm), 0 DOD	attempting): 9 loss,
					5 >40y	(40 <2cm)				(52 months)	3 terminations, 13 live births
Diaz, 2008*	Retrospective	28	28	VRT	32	IB1	20 SCC, 20 other	9	–	1 recurrences (IB1 AC <2cm,	9 pregnancies in 8 patients:
[34]					(20-43)					LVSI+), 1 DOD	1 loss, 2 terminations, 1 PTD,
										(44 months)	3 TD, 2 ongoing
Gil-Ibanez, 2020*	Retrospective	31	31	VRT	34	31 IB1 (<2cm)	20 SCC, 14 AC	4	–	4 recurrences (2 AC, 3 LVSI-,	22 pregnancies in 12 patients
[39]	(prospectively				(22-44)					3 IB1, 1 IA2), 0 DOD	(of 30 attempting): 11 loss, 5 PTD,
	collected data)									(73 months)	6 TD
Hauerberg, 2015	Retrospective	118	118	VRT	30	7 IA1, 8 IA2, 103	80 SCC, 36 AC,	30	1 NACT (>4cm), 4 CRT,	6 recurrences (5 IB1, 1 IA1,	77 pregnancies in 55 patients
[41]					(22-42)	IB1	2 ASCC		8 hysterectomy (not	3 AC, 2 SCC, 1 ASCC, 3 >2cm),	(of 72 attempting): 18 loss,
									oncology-related)	2 DOD (56 months)	3 terminations, 33 PTD, 20 TD
Helpman, 2011	Retrospective	140	140	VRT	31	IA-IB	66 SCC, 74 AC,	10	2 AT	94% 5y DFS	NR
[43]	(prospectively				(20-45)	(median 2cm)	15 ASCC, 5 other			(60 months)
	collected data)
Hertel, 2006	Retrospective	100	100	VRT	32	18 IA1, 21 IA2,	75 SCC, 33 AC	38	4 CT	4 recurrences (3 AC, 1 SCC),	18 pregnancies: 1 loss,
[44]	(prospectively				(21-41)	69 IB1 (<2cm)				2 DOD	2 terminations, 12 live births,
	collected data)									(29 months)	3 ongoing
Kim, 2012*	Retrospective	52	52	VRT	32	8 IA1, 5 IA2, 52 IB1	59 SCC, 12 AC,	23	4 RT	4 recurrences (4 >1cm), 0 DOD	NR
[48]					(22-44)	(18 <1cm, 47 >1cm)	4 ASCC			(26 months)
Kim, 2016	Retrospective	42	42	VRT	33	5 IA2, 25 IB1 (<2cm),	31 SCC, 7 AC,	7	–	1 recurrence (IB1 <2cm),	NR
[49]						12 IB1 (>2cm)	4 other			0 DOD
Lanowska, 2014	Retrospective	20	18	VRT	32	15 IB1 (>2cm), 4 IB2,	11 SCC, 8 AC,	5	All NACT	1 recurrence (IB2 AC), 0 DOD	7 pregnancies in 5 patients
[51]					(26-41)	1 IIA1	1 ASCC			(23 months)	(of 7 attempting): 2 loss, 2 PTD,
											2 TD, 1 ongoing
Machida, 2020*	Retrospective	20	20	VRT	33	39 IA1, 344 IB,	291 SCC, 74 AC,	142	10 NACT, 4 CRT,	21 recurrences, 10 DOD	NR
[62]					(± 4)	10 IIA	20 ASCC, 8 other		42 CT	(72 months)
Malmsten, 2019	Retrospective	39	28	VRT	30	1 IA1+LVSI, 20 IA2,	20 SCC, 8 AC	8	5 RH, CRT	2 recurrences (1 SCC, 1 AC),	24 pregnancies in 17 patients:
[64]					(24-37)	7 IB1				0 DOD	(of 29 attempting): 3 loss,
										(95 months)	4 terminations, 10 PTD, 7 TD
Mangler, 2014	Retrospective	320	320	VRT	32	46 IA1, 66 IA2,	215 SCC, 93 AC,	93	8 RT	10 recurrences (5 SCC, 4 AC,	NR
[67]					(21-48)	199 IB1 (<2cm)	4 ASCC			1 ASCC; 40% LVSI), 5 DOD
										(48 months)
Marchiole, 2007	Retrospective	135	118	VRT	32	10 IA1+LVSI, 19 IA2,	90 SCC, 25 AC/	43	12 AT	7 recurrences (6 >2cm),	NR
[68]						62 IB1 <2cm, 21 IB1	ASCC, 3 other			5 DOD
						>2cm, 6 II				(95 months)
Plante, 2011	Retrospective	140	125	VRT	31	7 IA1+LVSI, 30 IA2,	78 SCC, 52 AC,	40	4 NACT, 3 AT	1 recurrence (SCC, LVSI+),	106 pregnancies in 58 patients
[78]					(20-42)	97 IB1, 3 IB2, 3 IIA	10 ASCC			1 DOD	(of 58 attempting): 24 loss,
										(median 76 months)	19 PTD, 58 TD
Raju, 2012	Retrospective	51	51	VRT	28	2 IA1, 49 IB1	25 SCC, 24 AC,	34	2 RH, 2 RT	1 recurrence (IB1, AC, LVSI-),	21 pregancies in 15 patients
[80]					(20-40)	(mean 18mm)	2 ASCC			1 DOD	(of 24 attempting): 3 loss, 18 TD
										(median 96 months)
Renaud, 2000	Retrospective	34	31	VRT	32	1 IA1+LVSI, 13 IA2,	23 SCC, 10 AC,	4	1 CT	2 recurrences (1 NET), 2 DOD	NR
[81]					(24-42)	20 IB1 (2-4cm)	1 other			(36 months)
Shepherd, 2009	Retrospective	142	123	VRT	31	2 IA2, 139 IB1,	90 SCC, 44 AC,	46	11 CRT, 1 RH	4 recurrences (all SCC), 4 DOD	70 pregnancies in 53 patients:
[88]					(± 4)	1 IIA	4 ASCC, 4 other			(median 57 months)	29 loss, 33 live births, 4 ongoing
Shinkai, 2020	Retrospective	71	71	VRT	32	2 IA2, 18 IB1, 1 IIA	15 SCC, 4 AC,	NR	1 CT	1 recurrence, 0 DOD	28 pregnancies in 21 patients:
[89]					(23-46)		2 ASCC				5 loss, 23 PTD
Sonoda , 2008	Retrospective	43	41	VRT	31	8 IA1+LVSI, 7 IA2,	24 SCC, 16 AC,	NR	5 CRT	1 recurrence (IB1 AC), 0 DOD	11 pregnancies in 11 patients
[91]					(20-40)	28 IB1 (<2cm)	3 ASCC			(21 months)	(of 14 attempting): 1 loss, 2 term-
											inations, 4 live births, 4 ongoing
Speiser, 2011	Retrospective	212	212	VRT	22	34 IA1+LVSI, 47 IA2,	154 SCC, 55 AC,	NR	NR	8 recurrences, 4 DOD	60 pregnancies in 50 patients
[93]	(prospectively				(21-48)	131 IB1 (<2cm)	3 ASCC			(185 months)	(of 76 attempting): 9 loss, 2 term-
	collected data)										inations, 18 PTD, 27 TD, 4 ongoing
Uzan, 2013	Retrospective	28	28	VRT	32	6 IA2+LVSI, 22 IB1	20 SCC, 8 AC	NR	1 CRT	3 recurrences (3 LVSI+), 1 DOD	10 pregnancies in 9 patients
[100]					(28-40)	(<2cm)				(59 months)	(of 15 attempting): 2 loss,
											2 PTD, 6 TD
Wang, 2019*	Retrospective	72	72	VRT	32	26 IA1, 1 IA2,	78 SCC, 5 AC	NR	17 NACT, 5 CT	1 recurrence, 0 DOD	58 pregnancies in 54 patients
[102]					(± 5)	46 IB1				(36 months)	(of 69 attempting): 4 loss,
											4 terminations, 8 PTD, 42 TD
Yan, 2016	Retrospective	60	60	VRT	30	IB1	55 SCC, 5 AC	2	All NACT, 2 RH,	1 recurrence, 0 DOD	42 pregnancies (in 42 patients
[106]	(prospectively				(19-38)	(2 >2cm)			3 CRT, 1 RT	(43 months)	attempting): 6 loss, 36 TD
	collected data)
Yoon, 2015	Retrospective	21	21	VRT	32	4 IA1, 2 IA2, 15 IB1	15 SCC, 5 AC	11	1 AT	3 recurrences (3 IB1, 2 AC,	2 pregnancies in 2 patients:
[107]						(8 >2cm)				1 >2cm), 2 DOD	1 loss, 1 PTD
										(39 months)
Zusterzeel, 2016	Retrospective	132	129	VRT	31	4 IA1, 7 IA2,	95 SCC, 32 AC,	43	5 AT	9 recurrences (4 SCC, 4 AC,	47 pregnancies in 40 patients
[111]					(24-43)	121 IB1 (<2cm)	5 ASCC			1 ASCC, 5 LVSI+), 0 DOD	(of 70 attempting): 9 loss,
										(51 months)	1 termination, 12 PTD, 25 TD
FSS fertility-sparing surgery; LVSI lymph-vascular space invasion; VRT vaginal radical trachelectomy; SCC squamous cell carcinoma; AC adenocarcinoma; ASCC adenosquamous cell carcinoma; NACT neoadjuvant chemotherapy; AT adjuvant treatment;
CT chemotherapy; RT radiotherapy; CRT chemoradiation therapy; RH radical hysterectomy; DOD died of disease; TD term delivery; PTD preterm delivery; NR not reported; ± standard deviation; § International Federation of Gynecology and Obstetrics (FIGO)
2009 staging for cervical cancer; *Data (FIGO, histological subtype, LVSI, adjuvant treatment, oncological outcome, reproductive outcome) includes also patients who underwent abdominal radical trachelectomy or conisation/simple trachelectomy.

## Sheet: Table S7 ART
Table S7. Literature review of abdominal radical trachelectomy in patients with cervical cancer
Study	Design	n of patients		Modality	Age (y)	FIGO stage§	Histological	LVSI	(Neo)adjuvant	Oncological outcome	Reproductive outcome
		scheduled	underwent	of surgery	median	(tumor size)	subtype	positive	treatment	(median follow-up)
		for FSS	FSS		(range)
Abu, 2010*	Retrospective	36	36	ART	32	10 IA1+LVSI, 9 IA2,	42 SCC, 54 AC	38	27 RH or	1 recurrence, 1 DOD	20 pregnancies in 18 patients:
[18]					(6-45)	79 IB1			hysterectomy		4 loss, 3 terminations, 14 live
											births, 2 ongoing
Ayhan, 2019	Retrospective	22	22	ART	33	5 IA1+LVSI, 3 IA2,	14 SCC, 6 AC,	10	–	1 recurrence, 0 DOD	5 pregnancies (in 9 patients
[19]					(28-39)	14 IB1 (<2cm)	2 ASCC			(47 months)	attempting): 2 loss, 2 PTD, 1 TD
Cao, 2013	Retrospective	73	73	ART	31	5 IA1+LVSI, 10 IA2,	64 SCC, 9 AC	4	4 NACT (>2cm),	0 recurrences, 0 DOD	3 pregnancies (in 34 patients
[8]	(prospectively				(22-39)	58 IB1 (29 <2cm)			3 CT	(21 months)	attempting): 3 TD
	collected data)
Chernyshova,	Retrospective	68	68	ART	31	7 IA1+LVSI, 28 IA2	59 SCC, 9 AC	NR	–	2 recurrences, 0 DOD	19 pregnancies:
2020 [29]	(prospectively				(± 6)	30 IB1 (<3.5cm), 3 IIA				(69 months)	2 loss, 11 terminations, 5 PTD,
	collected data)										1 TD
Deng, 2017	Retrospective	49	45	ART	29	IB1 (2-4cm)	46 SCC, 3 AC	NR	16 CT	2 recurrences (2 SCC, 1 LVSI+),	5 pregnancies (in 19 patients
[33]	(prospectively				(19-40)					1 DOD	attempting): 4 loss, 1 TD
	collected data)									(61 months)
Diaz, 2008*	Retrospective	12	12	ART	37	IB1	20 SCC, 20 other	9	–	1 recurrences (IB1 AC <2cm,	9 pregnancies in 8 patients:
[34]					(22-45)					LVSI+), 1 DOD	1 loss, 2 terminations, 1 PTD,
										(44 months)	3 TD, 2 ongoing
Du, 2011	Retrospective	68	60	ART	33	3 IA1, 28 IA2, 37 IB1	SCC	NR	21 CT, 1 RT,	2 recurrences, 0 DOD	8 pregnancies in 5 patients
[35]					(18-41)	(<4cm)			1 hysterectomy	(38 months)	(of 15 attempting): 1 loss,
											2 PTD, 3 TD, 2 ongoing
Ebisawa, 2013	Retrospective	56	53	LRT	32	4 IA2, 52 IB1 (<25mm)	42 SCC, 12 AC,	14	3 hysterectomy	1 recurrence, 1 DOD	21 pregnancies in 13 patients
[36]					(22-42)		2 ASCC		+ CT	(60 months)	(of 25 attempting): 7 loss,
											10 PTD, 3 TD, 1 ongoing
Gent, 2014	Retrospective	28	28	ART,	31	3 IA1, 22 IB1 (mean	14 SCC, 11 AC,	10	3 NACT (>4cm)	2 recurrences, 1 DOD	14 pregnancies in 9 patients
[38]	(prospectively			nerve sparing	(21-37)	17.3mm), 3 IB2	2 ASCC, 1 other			(47.3 months)	(of 17 attempting): 14 TD
	collected data)
Guo, 2019	Retrospective	143	143	ART	31	IA2-IB1	111 SCC, 29 AC,	26	53 CT	4 recurrences (3 SCC, 1 ASCC,	30 pregnancies in 19 patients
[40]					(18-42)	(68 <2cm, 75 2-4cm)	4 ASCC			2 LVSI+, 2 >2cm), 3 DOD	(of 60 attempting): 20 loss,
										(75.5 months)	4 PTD, 6 TD
Johansen, 2016	Retrospective	56	49	robot ART	29	3 IA1, 14 IA2, 39 IB1	25 SCC, 18 AC,	NR	4 CRT	2 recurrences (2 IB1 AC), 0 DOD	20 pregnancies in 17 patients
[45]					(23-41)		5 ASCC			(24 months)	(of 21 attempting): 1 loss, 5 PTD,
											12 TD, 2 ongoing
Kasuga, 2016	Retrospective	172	172	ART	36	5 IA1, 2 IA2,	36 SCC, 10 AC,	NR	NR	NR	61 pregnancies in 48 patients
[46]					(± 4)	41 IB1	2 ASCC				(of 109 attempting): 13 loss,
											36 PTD, 6 TD
Kim, 2010	Retrospective	32	27	LRT	29	26 IB1, 1 IIA	20 SCC, 6 AC,	0	1 CT	1 recurrence (IIA 3cm LVSI-),	3 pregnancies: 2 loss, 1 PTD
[47]					(22-37)	(19 <2cm, 8 >2cm)	1 ASCC			1 DOD
										(31 months)
Kim, 2012*	Retrospective	13	13	ART	32	8 IA1, 5 IA2, 52 IB1	59 SCC, 12 AC,	23	4 RT	4 recurrences	NR
[48]					(22-44)	(18 <1cm, 47 >1cm)	4 ASCC			(26 months)
Li, 2019	Retrospective	333	333	ART	32	50 IA1+LVSI, 28 IA2,	271 SCC, 51 AC,	63	74 CT, 7 CRT	11 recurrences (all IB1,	25 pregnancies in 20 patients:
[56]					(19-42)	255 IB1 (132 >2cm)	11 ASCC			ASCC more often, <2cm and	8 loss, 2 terminations, 3 PTD,
										>2cm comparible), 5 DOD	12 TD
										(56 months)
Lintner, 2013	Retrospective	45	31	ART	32	17 IB1 (2-4cm), 14 IB2	17 SCC, 4 AC,	11	1 NACT, 3 CT	4 recurrences (1 IB2 glassy cell	4 pregnancies in 3 patients (of
[59]					(24-43)		5 ASCC, 5 other			tumor, 1 AC IB1, 1 SCC IB1 6cm),	8 attempting): 1 loss, 1 PTD, 2 TD
										2 DOD
										(90 months)
Lu, 2019	Retrospective	46	46	LRT	30	IB1	43 SCC, 3 AC	2	13 NACT (>2cm)	0 recurrences, 0 DOD	NR
[60]					(19-40)	(33 <2cm, 13 2-4cm)			2 AT	(80 months)
Machida, 2020*	Retrospective	310	310	ART	33	39 IA1, 344 IB, 10 IIA	291 SCC, 74 AC,	142	10 NACT, 4 CRT,	21 recurrences, 10 DOD	NR
[62]		29	29	LRT	(± 4)		20 ASCC, 8 other		42 CT	(72 months)
Matsuo, 2019	Retrospective	102	102	ART	29 (27-35)	12 IA2, 73 IB1, 17 IB nos	51 SCC, 40 AC, 1 other	84	2 NACT	recurrence NR, 7 DOD (ART)	NR
[69]		144	144	LRT/robot ART	31 (28-36)	13 IA2, 107 IB1, 19 IB nos	60 SCC, 68 AC, 16 other	55		(40 months)
										recurrence NR, 4 DOD (LRT/robot)
										(37 months)
Muraji, 2012	Retrospective	25	23	(m)ART	32	2 IA1, 2 IA2, 19 IB1	16 SCC, 6 AC,	5	NR	0 recurrences, 0 DOD	NR
[71]					(29-33)		1 ASCC			(38 months)
Nakajima, 2020	Retrospective	38	32	(m)ART	33	3 IA, 29 IB1 (11 >2cm)	25 SCC, 7 AC	NR	–	0 recurrences, 0 DOD	6 pregnancies in 6 patients
[72]					(25-43)					(33 months)	(of 9 attempting): 2 PTD, 4 TD
Nishio, 2013	Retrospective	114	114	ART	33	9 IA1+LVSI, 12 IA2,	99 SCC, 14 AC,	55	11 CT and/or RT	NR	31 pregnancies in 25 patients
[74]					(25-40)	93 IB1	1 ASCC			(33 months)	(of 69 attempting): 5 loss,
											17 PTD, 4 TD, 5 ongoing
Okugawa, 2020	Retrospective	212	182	(m)ART	33	4 IA1, 23 IA2, 177	150 SCC, 49 AC,	85	11 NACT, 22 CT	3 recurrences (2 SCC, 1 AC,	36 pregnancies in 26 patients:
[75]					(21-42)	IB1 (125 <2cm), 8 IIA1	13 ASCC			2 >2cm), 1 DOD	14 loss, 12 PTD, 8 TD, 2 ongoing
										(72 months)
Park, 2014	Retrospective	63	55	LRT	32	2 IA2, 53 IB1 (median	42 SCC, 13 AC	5	3 CT	NR	14 pregnancies in 10 patients
[76]					(22-40)	1.4cm)				(37 months)	(of 18 attempting): 4 loss, 6 PTD,
											4 TD
Park, 2014	Retrospective	88	79	LRT	31	4 IA1, 72 IB1, 2 IB2, 1	60 SCC, 18 AC,	12	9 CT	9 recurrences (6 >2cm, 2 ASCC,	17 pregnancies in 13 patients:
[77]					(20-40)	IIA (50 <2cm, 29 >2cm)	1 ASCC			7 SCC, 8 IB1, 1 IIA), 1 DOD	4 loss, 7 PTD, 6 TD
										(44 months)
Rendon, 2020*	Retrospective	11	11	ART	27	17 IB1, 7 IB2, 1 IIA1	23 SCC, 2 AC	NR	all NACT, 1 CT,	0 recurrences, 0 DOD (ART)	13 pregnancies in 10 patients
[82]		9	9	LRT	(20-37)	(>2cm)			1 RH	2 recurrences, 0 DOD (LRT)	(of 23 attempting): 1 loss, 7 PTD,
										1 recurrence, 0 DOD (CKC)	4 TD, 1 ongoing
										(47 months)
Saadi, 2017	Retrospective	22	22	LRT	33	5 IA2, 17 IB1 (21 <2cm)	17 SCC, 5 AC	10	1 NACT (>3cm)	2 recurrences (2 IB1, 2 SCC,	2 pregnancies in 2 patients:
[85]					(22-40)					2 LVSI-), 0 DOD	1 PTD, 1 TD
										(16 months)
Saso, 2012	Retrospective	27	27	ART	33	2 IA2, 25 IB1 (5 >2cm),	15 SCC, 10 AC,	3	NR	3 recurrences (2 AC, 1 SCC),	3 pregnancies in 3 patients
[86]		3	3	LRT	(23-41)	2 IB2, 1 IIA	4 ASCC, 1 other			2 DOD	(of 10 attempting): 1 loss, 2 TD
										(24 months)
Shah, 2019	Retrospective	39	39	ART nos	30	5 IA1, 14 IA2, 20 IB1	15 SCC, 23 AC,	NR	NR	0 recurrences, 0 DOD	20 pregnancies in 13 patients
[87]					(25-37)		1 ASCC				(of 24 attempting): 5 loss,
											1 termination, 14 live births
Tamauchi, 2016	Retrospective	28	28	ART	31	4 IA2, 24 IB1	21 SCC, 5 AC,	11	7 CT	0 recurrences, 0 DOD	8 pregnancies in 8 patients
[95]					(27-37)		2 ASCC			(43 months)	(of 12 attempting): 3 loss, 4 PTD,
											1 TD
Testa, 2013	Retrospective	30	25	ART	31	6 IA2, 19 IB1 (4 >2cm)	20 SCC, 5 AC	5	NR	0 recurrences, 0 DOD	3 pregnancies in 3 patients
[96]					(22-40)					(30 months)	(of 6 attempting): 2 PTD, 1 TD
Tokunaga,	Retrospective	42	42	ART	32	1 IA1, 4 IA2, 37 IB1	SCC	5	2 CRT, 1 RT,	3 recurrences, 2 DOD	5 pregnancies in 5 patients
2015 [97]	(prospectively				(22-39)	(<2cm)			1 CT	(30 months)	(of 18 attempting): 1 loss,
	collected data)										1 termination, 3 live births
Vieira, 2015	Retrospective	58	58	ART	29	6 IA1+LVSI, 25 IA2,	49 SCC, 42 AC,	25	2 RT, 1 CRT,	1 recurrence, 1 DOD (ART)	41 pregnancies in 19 patients
[101]		42	42	LRT/robot ART	(21-40)	69 IB1 (<2cm)	7 ASCC, 2 other		1 CT	(66 months)	(of 34 attempting): 5 loss, 9 PTD,
											1 TD, 4 ongoing
Wethington,	Retrospective	101	81	ART	31	3 IA1+LVSI, 8 IA2,	40 SCC, 54, AC,	38	1 NACT, 8 CRT	4 recurrences, 0 DOD	31 pregnancies in 29 patients
2012 [104]					(19-43)	88 IB1, 1 IB2, 1 IIA	6 ASCC, 1 other			(32 months)	(of 38 attempting): 9 loss, 16 live
											births, 6 ongoing
Yoon, 2015	Retrospective	17	17	LRT	32	3 IA1, 14 IB1	10 SCC, 6 AC,	5	4 CRT of RT	0 recurrences, 0 DOD	1 pregnancy: 1 PTD
[107]						(5 <2cm, 12 >2cm)	1 ASCC			(14 months)
Yoshino, 2020	Retrospective	42	42	ART	34	5 IA2, 35 IB1, 2 IIA1	37 SCC, 3 AC,	16	9 CT/CRT/	4 recurrences (3 SCC, 1 AC,	7 pregnancies in 7 patients
[108]					(25-42)	(37 <2cm)	2 other		hysterectomy	1 LVSI+, 1 >2cm), 1 DOD	(of 19 attempting): 1 loss, 2 PTD,
										(63 months)	3 TD, 1 ongoing
Zhang, 2014	Retrospective	38	36	ART	32	IB1	25 SCC, 8 AC,	NR	13 AT	0 recurrences, 0 DOD	NR
[110]					(20-41)	(20 <2cm, 16 2-4cm)	1 ASCC, 2 other			(12 months)
FSS fertility-sparing surgery; LVSI lymph-vascular space invasion; ART abdominal radical trachelectomy (open); LRT laparoscopic radical trachelectomy; robot ART robot-assisted abdominal radical trachelectomy; (m)ART modified abdominal
radical trachelectomy (open); SCC squamous cell carcinoma; AC adenocarcinoma; ASCC adenosquamous cell carcinoma; NACT neoadjuvant chemotherapy; AT adjuvant treatment; CT chemotherapy; RT radiotherapy; CRT chemoradiation therapy;
RH radical hysterectomy; DOD died of disease; TD term delivery; PTD preterm delivery; NR not reported; ± standard deviation; nos not otherwise specified; § International Federation of Gynecology and Obstetrics (FIGO) 2009 staging for cervical cancer;
*Data (FIGO, histological subtype, LVSI, adjuvant treatment, oncological outcome, reproductive outcome) includes also patients who underwent vaginal radical trachelectomy or conisation/simple trachelectomy.

## Sheet: Table S8 FSS vs non-FSS
Table S8. Literature review of FSS versus non-FSS in patients with cervical cancer
Study	Design	n of	Modality	n of	Modality	Age (y)	FIGO stage§	Histological	LVSI	(Neo)adjuvant	Oncological outcome
		patients	of surgery	patients	of surgery	median	(tumor size)	subtype	positive	treatment	FSS vs non-FSS
		underwent	FSS	underwent	non-FSS	(range)	FSS vs non-FSS	FSS vs non-FSS	FSS vs non-FSS	FSS vs non-FSS	(median follow-up)
		FSS		non-FSS
Beiner, 2008	Retrospective	90	VRT	90	RH	31 (20-44)	IA-IB	SCC 39 vs 39	61 vs 61	1 vs 1 RT	5 vs 1 recurrence (NS)
[21]						vs 34 (19-44)		AC 44 vs 44			95 vs 100% 5y DFS (NS)
								ASCC 6 vs 6			3 vs 1 DOD (NS)
								other 1 vs 1			99 vs 100% 5y DSS (NS)
											(51 vs 58 months)
Bekkers, 2002	Retrospective	53	LLETZ / CKC	20	UE	34 vs 44	IA1	SCC	5 vs 4	4 vs 0 UE	0 vs 0 recurrences
[22]											(72 months)
Biliatis, 2012	Retrospective	34	LLETZ + LND	27	UE	32 (26-43)	IB1 (<2cm)	49 SCC, 11 AC	4 in total	1 vs 0 UE	0 vs 0 recurrences
[24]						vs 42 (29-67)		2 ASCC in total			(56 months)
Bisseling, 2007	Retrospective	18	CKC +/- LND	20	UE / RH	NR (25-48)	29 IA1, 9 IA2 in total	36 AC, 1 ASC	4 in total	–	0 vs 0 recurrences
[25]								1 other in total			(72 months)
Cui, 2018	Retrospective	427	RT nos	854	RH	<30y 34 vs 34%	IA2 45 vs 85	SCC 186 vs 275	NR	NR	92.3 vs 92.4% 5y OS (NS)
[31]						30-39y 52 vs 53%	IB 260 vs 524	AC 183 vs 363			(53 months)
						40-49y 14 vs 14%	IB2 10 vs 15	ASCC 26 vs 47
							IB nos 112 vs 230	other 32 vs 69
Diaz, 2008	Retrospective	40	VRT / ART	110	RH	32 (20-43)	IB1	SCC 20 vs 57	9 vs 30	–	96 vs 86% 5y DFS (NS)
[34]						vs 37 (22-45)	(<2cm 93 vs 61%)	other 20 vs 52			92 vs 91% 5y OS (NS)
											(15 vs 44 months)
Gent, 2014	Retrospective	28	ART, nerve	77	RH, nerve	31 (21-37)	IA1 3 vs 6	SCC 14 vs 55	10 vs 19	3 vs 0 NACT	2 vs 11 recurrence (NS)
[38]			sparing		sparing	vs 44 (32-73)	IB1 22 vs 63	AC 11 vs 19			80 vs 85% 5y DFS (NS)
							IB2 3 vs 8	ASCC 2 vs 2			1 vs 2 DOD (NS)
							(mean 17.3	other 1 vs 1			90 vs 87% 5y OS (NS)
							vs 20.6mm)				(47 vs 52 months)
Guo, 2018	Retrospective	143	ART	186	RH	31 (18-42)	IA2-IB1	SCC 111 vs 139	26 vs 35	53 vs 67 CT	4 vs 8 recurrences (NS)
[40]						vs 38 (28-44)	(<2 cm 68 vs 87)	AC 28 vs 41			97.1 vs 95.4% 5y DFS (NS)
								ASCC 4 vs 6			3 vs 4 DOD (NS)
											97.8 vs 97.7% 5y OS (NS)
He, 2014	Retrospective	25	CKC	83	UE/RH	mean 34 vs 46	IA1	SCC	5 in total	2 vs 0 re-CKC	0 vs 0 recurrences
[42]											(12 months)
Helpman, 2011	Retrospective	140	VRT	187	RH	31 (20-45)	IA1-IB1 (<2cm)	SCC 66 vs 0	10 vs 39	2 vs 22 AT	94 vs 93% 5y OS (NS)
[43]						vs 40 (25-74)		AC 74 vs 187			(60 vs 43 months)
Kim, 2016	Retrospective	42	VRT	64	RH	mean 33 vs 45	IA2 5 vs 5,	SCC 31 vs 59	7 vs 21	2 vs NR AT	1 vs 5 recurrences
[49]							IB1 37 vs 54	AC 7 vs 5
							IB2 0 vs 5	other 4 vs 0
Lee, 2009	Retrospective	22	CKC	53	UE / RH	35 (25-67)	IA1	SCC	9 vs 20	13 vs 0 re-CKC	0 vs 0 recurrences
[53]						vs 48 (31-84)					(37 vs 34 months)
Lu ,2019	Retrospective	46	LRT	73	UE	30 (19-40)	IB1	SCC 43 vs 63	2 vs 19	13 vs 0 NACT	0 vs 2 recurrencec (NS)
[60]						vs 43 (31-65)		AC 3 vs 6		2 vs 22 AT	0 vs 1 DOD (NS)
								other 0 vs 4			100 vs 98.6% 5y OS
											(80 vs 72 months)
Machida, 2018	Retrospective	190	RT nos	6169	UE / RH	31 (28-34)	IA1 43 vs 2696	SCC 92 vs 4062	NR	7 vs 374 RT	96.9 vs 96.6% 5y DSS (NS)
[63]						vs 37 (33-41)	IA2 47 vs 1330	AC 86 vs 1863		5 vs 185 CT	(64 vs 92 months)
							IA nos 2 vs 114	ASCC 12 vs 244
							IB1 <2cm 98 vs 2029
Maneo, 2008	Retrospective	16	CKC + LND	30	RH	30 (17-39)	IB1	SCC 9 vs 12	1 vs 3	16 vs 0 NACT	0 vs 1 recurrence (NS)
[66]						vs 31 (23-39)		AC 12 vs 18		2 RT vs 5 CRT	0 vs 1 DOD (NS)
											(69 months)
Marchiole, 2007	Retrospective	118	VRT	139	RH	32 vs 47	IA1+LVSI 10 vs 8	SCC 90 vs 102	43 vs 35	12 vs 9 AT	7 vs 9 recurrences (NS)
[68]							IA2 19 vs 17	AC/ASCC 25 vs 33			95.5 vs 94.7% 5y DFS (NS)
							IB1 <2cm 62 vs 51	other 3 vs 4			5 vs 7 DOD (NS)
							IB1 >2cm 21 vs 55				95 vs 95% 5y OS (NS)
							II 6 vs 8
Matsuo, 2018	Retrospective	29	RT nos	1428	RH	31 (28-35)	IB1 >2cm	SCC 18 vs 824	NR	4 vs 512 RT	14.4 vs 8.4% DOD (NS)
[70]						vs 37 (33-41)		AC 10 vs 466		5 vs 307 CT	(76 months)
								ASCC 1 vs 138
Renaud 2000	Retrospective	33	VRT	57	RH	32 (24-42)	IA1+LVSI 1 vs 0	SCC 23 vs 36	4 vs 12	1 vs 0 CT	2 vs 2 recurrences (NS)
[81]						vs 37 (26-68)	IA2 13 vs 3	AC 11 vs 21			2 vs 0 DOD (NS)
							IB1 20 vs 53				(36 months)
							11A 0 vs 1
Sopracordevole,	Retrospective	132	CKC	21	UE / RH	44 (25-78)	IA1 123 vs 20	145 SCC, 7 AC	2 vs 3	–	0 vs 0 recurrences, 0 vs 0 DOD
2014 [92]						in total	IA2 9 vs 1	1 ASCC in total			(185 months)
Spoozak, 2012	Retrospective	966	CKC	3021	UE	NR	IA1 554 vs 1610	SCC 784 vs 2215	NR	NR	IA1 SCC 95.1 vs 95.6% 5y OS (NS)
[94]							IA2 434 vs 1389	AC 182 vs 806			IA1 AC 98.8 vs 96.9% 5y OS (NS)
											IA2 SCC 90.2 vs 96.3% 5y OS (NS)
											IA2 AC 97.8 vs 98.2% 5y OS (NS)
Tseng, 2018	Retrospective	125	CKC / RT nos	2592	UE / RH	33 (17-44)	IB1	SCC 789 vs 1725	NR	22 vs 748 RT	93 vs 94% 5y DSS (NS)
[99]						vs 37 (17-44)		AC 38 vs 636			≤2cm 96.8 vs 96.3% 5y DSS (NS)
								ACC 8 vs 231			>2cm 82.4 vs 90.4% 5y DSS (NS)
Wright, 2010	Retrospective	568	CKC	841	UE	<30y 220 vs 151	IA1	SCC	NR	NR	98 vs 99% 5y OS (NS)
[105]						30-35y 226 vs 329					(60 months)
						>35y 122 vs 361
Yoshino, 2020	Retrospective	42	ART	173	RH	34 (25-42)	IA1 5 vs 6	SCC 37 vs 107	16 vs 75	9 vs 63 AT	89.8 vs 92.7% 5y DFS (NS)
[108]						vs 59 (26-77)	IB1 35 vs 56	AC 3 vs 51			97.3 vs 95.0% 5y OS (NS)
							IIA1 2 vs 11	ASCC 0 vs 1
								other 2 vs 14
Zhang, 2014	Retrospective	36	ART	90	RH	32 (20-41)	IB1	SCC 25 vs 64	NR	13 vs 47 AT	0 vs 0 recurrences
[110]						vs 50 (20-71)		AC 8 vs 17			0 vs 0 DOD
								ASCC 1 vs 8			(12 vs 13 months)
								other 2 vs
FSS fertility-sparing surgery; non-FSS non-fertility sparing surgery; LVSI lymph-vascular space invasion; ART abdominal radical trachelectomy (open); RT nos radical trachelectomy not otherwise specified; VRT vaginal radical trachelectomy;
LLETZ large loop excision of transformation zone; CKC cold knife conisation; LND lymph node dissection; RH radical hysterectomy; UE uterus extirpation; SCC squamous cell carcinoma; AC adenocarcinoma; ASCC adenosquamous cell carcinoma;
NACT neoadjuvant chemotherapy; AT adjuvant treatment; CT chemotherapy; RT radiotherapy; CRT chemoradiation therapy; DOD died of disease; DFS disease free survival; OS overal survival; DSS disease specific survival;
NR not reported; NS not significant; § International Federation of Gynecology and Obstetrics (FIGO) 2009 staging for cervical cancer.

## Sheet: Table S9 Ovarian
Table S9. Literature review of FSS in patients with epithelial ovarian cancer
Study	Design	n of	Age (y)	FIGO stage§	Histological subtype	Grade	FSS staging	Oncological outcome	Reproductive outcome
		patients	median					(median follow-up)
			(range)
Baek, 2020^	Retrospective	95	28	58 IA, 2 IB	55 muc, 13 end	59 gr1, 12 gr2	90 U(S)O, 5 UOC	20 recurrence, 13 DOD	NR
[112]			(10-40)	23 IC1, 8 IC2, 4 IC3	8 ser, 16 CC	23 gr3, 1 na	63 staging, 51 OMT,	(58 months)
					3 mixed		40 PLND +/- PALND
Chen, 2020	Retrospective	36	23.5	7 IA/IB	32 muc, 1 end	29 gr1, 5 gr2	32 USO, complete peritoneal	2 recurrence, 2 DOD	17 pregnancies in 15 patients
[113]			(16-40)	29 IC	3 ser	2 gr3	staging, PLND +/- PALND	(47 months)	(of 16 attempting): 17 TD
Crafton, 2020#$	Retrospective	2289	NR	1128 IA/IB	884 muc, 734 end	1734 gr1/2	NR	recurrence NR, 392 DOD	NR
[115]			(15-44)	536 IC	542 ser, 129 CC	555 gr3		(65 months)
				628 II-IV
Ditto, 2015	Retrospective	70	30 (25-35)	46 IA, 2 IB, 15 IC	36 muc, 8 end	36 gr1, 24 gr2	70 USO, complete peritoneal	recurrence NR, DOD NR	NR
[116]				1 IIA, 1 IIC, 5 IIIC	18 ser, 8 other	9 gr3, 1 na	staging, PLND +/- PALND	(76 months)
Fruscio, 2016	Retrospective	242	31.3	129 IA, 2 IB	101 muc, 55 end	145 gr1, 69 gr2	134 USO/UOC, complete	29 recurrence, 12 DOD	NR
[118]			(14-43.6)	57 IC1, 46 IC2/3	62 ser, 17 CC	27 gr3, 9 na	peritoneal staging,	(143 months)
				8 na	7 mixed		PLND +/- PALND
Ghezzi, 2016	Retrospective	65	33	42 IA, 1 IB, 18 IC	25 muc, 21 end,	38 gr1, 19 gr2	NR	10 recurrence, 3 DOD	23 pregnancies in 22 patients
[119]			(21-42)	1 IIB, 3 IIIC	15 ser, 3 CC, 1 SC	8 gr3		84.6% RFS, 95.4% OS	(of 35 attempting): 19 TD,
								(38 months)	1 loss, 3 ongoing
Gouy, 2018	Retrospective	21	25	9 IA	12 muc expansile	9 gr1, 5 gr2	21 USO, 20 complete	2 recurrence, 0 DOD, 1 AWD	6 pregnancies in 6 patients
[120]			(17-42)	6 IC1, 6 IC2	9 muc infiltrative	1 gr3	peritoneal staging	(46 months)
							10 LND
Jiang, 2017*	Retrospective	52	25	19 IA/B	38 muc, 11 end	45 gr1, 4 gr2	52 USO	5 recurrence, 1 DOD, 1 AWD	32 pregnancies in 29 patients
[122]			(16-40)	24 IC1, 9 IC2/3	1 ser, 2 CC	3 gr3	48 OMT, LND	91.0% 5y RFS, 97.3% 5y DSS	(of 34 attempting): 28 TD,
							24 PALND	(60 months)	3 loss, 1 termination
Johansen, 2020	Retrospective	36	29	27 IA	18 muc, 10 end	6 gr1, 2 gr2	33 cytologie, 30 biopsies	2 recurrence, 1 DOD	12 pregnancies in 9 patients:
[123]	(prospectively		(19-39)	6 IC1, 3 IC2	3 ser, 3 CC	1 gr1/2, 6 gr3	31 OMT, 8 PLND, 8 PALND	93% 5y RFS, 97% 5y OS	12 TD
	collected data)				2 other	21 na		(63 months)
Kajiyama, 2019~	Retrospective	101	33	43 IA	51 muc, 24 end	79 gr1/2	NR	17 recurrence, 11 DOD	NR
[124]			(±7.6)	43 IC1, 15 IC2/IC3	3 ser, 22 CC	22 gr3		80.8% 5y RFS, 87.5% 5y OS
					1 other			(66 months)
Kwon, 2009	Retrospective	21	26.7	17 IA	16 muc, 2 end	16 gr1, 3 gr2	21 USO	1 recurrence, 0 DOD	5 pregnancies in 5 patients:
[125]			(22-33)	4 IC	1 ser, 2 CC	2 gr3	14 complete peritoneal	(43 months)	5 TD
							staging, LND
Lee, 2015	Retrospective	35	28.6	21 IA, 13 IC	35 muc	27 gr1, 5 gr2	35 USO, cytology, 12 OMT	6 recurrence, DOD NR	NR
[126]			(±10.1)	1 IIC		1 gr3, 2 na	7 biopsies, 2 LND	91.3% 5y DSS, 81.4% 10y DSS
								(104 months)
Morice, 2005	Retrospective	34	27	30 IA, 3 IC	21 muc, 5 end	15 gr1, 15 gr2	34 USO, complete peritoneal	11 recurrence, 4 DOD, 2 AWD	10 pregnancies in 9 patients:
[127]			(14-36)	1 IIA	3 ser, 2 SC	4 gr3	staging	63% 5y RFS, 84% 5y OS	6 TD, 1 loss, 1 ongoing, 2 na
					3 mixed (muc/ser)		24 PLND, 26 PALND	(47 months)
Mueller, 2018	Retrospective	32	26	14 IA	32 muc	18 gr1	32 USO, cytology	8 recurrence, DOD NR	NR
[128]			(15-40)	16 IC, 2 na		6 gr2/3, 8 na	31 OMT, 13 PLND, 16 PALND	73% 5y RFS
								(72.2 months)
Nasioudis, 2020#	Retrospective	330	32	224 IA	172 muc, 111 end	248 gr2, 82 gr3	NR	recurrence NR, 28 DOD	NR
[129]				97 IC, 9 I nos	47 ser			90.8% 5y OS, 92.2% 5y DSS
								(119 months)
Park, 2008^	Retrospective	62	26	36 IA, 2 IB, 21 IC	41 muc, 8 end	48 gr1, 5 gr2	49 USO, 10 UO, 3 UOC,	11 recurrence, 6 DOD, 2 AWD	24 pregnancies in 15 patients
[130]			(13-40)	1 IIB, 1 IIIA, 1 IIIC	7 ser, 4 CC	9 gr3	62 complete peritoneal	80% 5y RFS, 88% 5y OS	(of 19 attempting): 22 TD,
					2 mixed		staging, 18 PLND +/- PALND	(56 months)	2 loss
Park, 2016^	Retrospective	22	36.5	12 IA	19 CC	22 gr3	22 USO	5 recurrence, 2 DOD, 1 AWD	8 pregnancies in 6 patients:
[131]			(±4.9)	10 IC	3 mixed CC		20 OMT, 19 PLND+PALND	77% 5y RFS, 91% 5y OS	7 TD, 1 loss
								(82 months)
Ratanasrithong,	Retrospective	28	NR	NR	NR	NR	NR	4 recurrence, 1 DOD, 1 AWD	4 pregnancies (in 7 patients
2017 [132]								(42 months)	attempting): 4 TD
Satoh, 2010	Retrospective	211	29	126 IA	126 muc, 27 end	160 gr1, 15gr2	205 USO, 6 UOC	18 recurrence, 5 DOD, 5 AWD	76 pregnancies in 55 patients:
[133]			(14-40)	55 IC1, 18 IC2	27 ser, 30 CC	36 gr3	87 at least OMT, 55 LND	(78 months)	66 live births
				12 IC3	1 mixed
Schilder, 2002	Retrospective	52	26	42 IA	25 muc, 10 end	38 gr1, 9 gr2	52 USO, complete peritoneal	5 recurrence, 2 DOD	32 pregnancies in 17 patients
[134]			(11-40)	10 IC	10 ser, 5 CC	5 gr3	staging, LND	98% 5y OS, 93% 10y OS	(of 24 attempting): 26 TD,
					2 mixed			(68 months)	5 loss, 1 ongoing
Schlaerth, 2009	Retrospective	20	27	11 IA	11 muc, 6 end	14 gr1, 5 gr2	20 USO, OMT	3 recurrence, 3 DOD	9 pregnancies in 6 patients:
[135]				9 IC	1 ser, 1 CC, 1 na	1 gr3	18 LND	84% 5y RFS, 84% 5y OS	9 TD
								(122 months)
Watanabe, 2020	Retrospective	29	27.2	14 IA	16 muc, 5 end	13 gr1, 10 gr2	28 USO, 1 UOC	5 recurrence, 2 DOD, 1 AWD	7 pregnancies in 5 patients:
[136]			(12-39)	6 IC1, 9 IC3	5 ser, 3 CC	6 gr3	18 OMT, 15 LND	73.1% 5y RFS, 95.7% 5y OS,	6 live births
								89.3% 10y OS (61 months)
Yin, 2019*	Retrospective	40	28	11 IA, 27 IC	19 muc, 8 end	40 gr1/2	40 USO, complete peritoneal	4 recurrence, 0 DOD	8 pregnancies in 8 patients
[137]			(18-44)	1 IIB, 1 IIIA	4 ser, 10 CC		staging, PLND, PALND	87.5% 5y RFS	(of 13 attempting): 3 TD, 2 PTD,
								(54 months)	2 loss, 1 termination
Yoshihara, 2019~	Retrospective	21	36.2	18 IA/IC1	21 CC	21 gr3	21 USO, complete peritoneal	3 recurrence, 1 DOD	7 pregnancies: 3 TD, 1 PTD,
[138]			(±3.5)	3 IC2/IC3			staging, LND	68.8% 10y RFS, 79.8% 10y OS	2 loss, 1 termination
								(56 months)
FSS fertility-sparing surgery; muc mucinous; end endometrioid; ser serous; CC clear cell; SC small cell; OMT omentectomy; LND lymph node dissection; PLND pelvic lymph node dissection; PALND para-aortic lymph node dissection; USO unilateral
salpingo-oophorectomy; UO unilateral oophorectomy; UOC unilateral ovarian cystectomy; complete peritoneal staging: cytology, biopsies and OMT; DOD died of disease; AWD alive with disease; RFS recurrence-free survival; OS overall survival;
DSS disease-specific survival; TD term delivery; PTD preterm delivery; NR not reported; na not available; nos not otherwise specified; ± standard deviation; ^*~# possible overlap of patients; $ likely overlap of patients between the 2 used databases;
§ International Federation of Gynecology and Obstetrics (FIGO) 1988 or 2014 staging for ovarian cancer.

## Sheet: Table S10 FSS vs non-FSS
Table S10. Literature review of FSS versus non-FSS in patients with epithelial ovarian cancer
Study	n of	n of	Age (y)	FIGO stage§	Histological subtype	Grade	Staging and	Oncological outcome
	patients	patients	median	FSS vs non-FSS (n)	FSS vs non-FSS (n)	FSS vs non-FSS (n)	adjuvant treatment	FSS vs non-FSS (n)
	FSS	Non-FSS	(range)				FSS vs non-FSS (n)	(follow-up)
Chen, 2020	36	51	24 (16-40)	IA/IB 7 vs 12	muc 32 vs 21, end 1 vs 8	gr1 29 vs 28	complete staging	recurrence 2 vs 1
[113]			vs 35 (20-40)	IC 29 vs 39	ser 3 vs 15, CC 0 vs 5	gr2 5 vs 6	32 vs 50 (NS)	DOD 2 vs 0
			(S)	(NS)	mixed 0 vs 2	gr3 2 vs 17	CT 28 vs 43 (NS)	RFS HR 2.07 (NS)
					(S)	(S)		(47 months)
Crafton, 2020	2289	6728	NR (15-44)	IA/IB 1128 vs 2293	muc 884 vs 1219	gr1/2 1734 vs 4166	CT 1112 vs 4401	recurrence NR
[115]			(S)	IC 536 vs 1321	end 734 vs 2386	gr3 555 vs 2562	(S)	DOD 392 vs 1609 (NS)
				II-IV 628 vs 3114	ser 542 vs 2523	(S)		(65 months)
				(S)	CC 129 vs 618 (S)
Ditto, 2015	70	237	30 (25-35)	IA 46 vs 95, IB 2 vs 21	muc 36 vs 32	gr1 36 vs 64	CT 26 vs 169 (S)	recurrence NR, DOD NR
[116]			vs 51 (43-58)	IC 15 vs 45, II 0 vs 2	end 8 vs 71	gr2 24 vs 80		RFS HR 1.06 (NS)
			(S)	IIA 1 vs 11, IIB 0 vs 17, IIC 1 vs 6	ser 18 vs 83	gr3 9 vs 85		OS HR 1.94 (NS)
				IIIB 0 vs 1, IIIC 5 vs 39 (S)	other 8 vs 48 (S)	na 1 vs 8 (S)		(76 vs 81 months)
Fruscio, 2016	242	789	31 (14-44)	IA 129 vs 337, IB 2 vs 63	muc 101 vs 152, end 55 vs 203	gr1 145 vs 225	adequate staging	recurrence 29 vs 166, DOD 12 vs 105
[118]			vs 53 (24-86)	IC1 57 vs 136	ser 62 vs 237, CC 17 vs 134	gr2 69 vs 225	134 vs 578 (S)	RFS HR 0.82 (NS)
			(S)	IC2/3 46 vs 223	mixed 7 vs 50, na 0 vs 7	gr3 27 vs 320	CT 103 vs 494 (S)	DSS HR 0.85 (NS)
				na 8 vs 30 (S)	(S)	na 1 vs 19 (S)		(143 months)
Jiang, 2017	52	56	25 (16-40)	IA/B 19 vs 17	muc 38 vs 14	gr1 45 vs 27	OMT 48 vs 56 (NS)	recurrence 5 vs 9, DOD 1 vs 7
[122]			vs 35 (17-40)	IC1 24 vs 31	end 11 vs 16	gr2 4 vs 8	LND 48 vs 55 (NS)	91% vs 83% 5y RFS (NS)
			(S)	IC2-3 9 vs 8	ser 1 vs 8	gr3 3 vs 21	CT 33 vs 50 (S)	97% vs 89% 5y DSS (S)
				(NS)	CC 2 vs 18 (S)	(S)		(60 vs 96 months)
Johansen, 2020	36	47	29 (19-39)	IA 27 vs 18	muc 18 vs 12	gr1 6 vs 4	OMT 31 vs 45	recurrence 2 vs 6, DOD 1 vs 2
[123]			vs 37 (26-40)	IC1 6 vs 19, IC2 3 vs 6	end 10 vs 12	gr2 2 vs 3	LND 16 vs 46	93% vs 82% 5y RFS (NS)
			(S)	IC3 0 vs 2, IC nos 0 vs 2	ser 3 vs 8	gr1/2 1 vs 2	CT 14 vs 34 (S)	97% vs 89% 5y OS (NS)
				(S)	CC 3 vs 13, other 2 vs 2	gr3 6 vs 22		(63 vs 64 months)
Kajiyama, 2019	101	184	33 (±8)	IA 43 vs 66, IB 0 vs 2	muc 51 vs 38, end 24 vs 54	gr1/2 79 vs 106	CT 64 vs 150 (S)	recurrence 17 vs 25, DOD 11 vs 20
[124]			vs 41 (±4)	IC1 43 vs 74	ser 3 vs 15, CC 22 vs 73	gr3 22 vs 78 (S)		81% vs 87% 5y RFS (NS)
			(S)	IC2/IC3 15 vs 42	mixed 0 vs 3, other 1 vs 1			88% vs 92% 5y OS (NS)
				(NS)	(S)			(66 months)
Lee, 2015	35	55	29 (±10)	IA 21 vs 34, IB 0 vs 1	muc	gr1 27 vs 34	OMT 12 vs 45	recurrence 6 vs 9, DOD NR
[126]			vs 50 (±14)	IC vs 17, IIA 0 vs 1		gr2 5 vs 15	LND 2 vs 26	91% vs 86% 5y DSS (NS)
			(S)	IIB 0 vs 2, IIC 1 vs 0		gr3 1 vs 2	CT 14 vs 26 (NS)	81% vs 82% 10y DSS (NS)
				(NS)		na 2 vs 4 (NS)		(104 months)
Mueller, 2018	32	44	26 (15-40)	IA 14 vs NR	muc	gr1 18 vs 22	OMT 31 vs 41	recurrence 8 vs 9, DOD NR
[128]			vs 38 (17-45)	IC 16 vs NR		gr2/3 6 vs 10	LND 29 vs 32 (NS)	73% vs 84% 5y RFS (S)
			(S)	2 na		(NS)	CT 6 vs 14 (NS)	(72 months)
Nasioudis, 2020	330	709	32 vs 41 (S)	IA 224 vs 447	muc 172 vs 246,	gr2 248 vs 506,	LND 207 vs 557 (S)	recurrence NR, DOD 28 vs 63
[129]				IC 97 vs 240	end 111 vs 315	gr3 82 vs 203		91% vs 93% 5y OS (NS)
				I nos 9 vs 22	ser 47 vs 148	(NS)		92% vs 94% 5y DSS (NS)
				(NS)	(S)			(119 months)
Park, 2016	22	25	37 (±5)	IA 12 vs 10	CC 19 vs 24	gr3	OMT 20 vs 23	recurrence 5 vs 5, DOD 2 vs 4
[131]			vs 41 (±4)	IC 10 vs 15	mixed CC 3 vs 1		LND 19 vs 23	77% vs 84% 5y RFS
			(S)	(NS)	(NS)		CT 20 vs 23 (NS)	91% vs 88% 5y OS (NS)
								(82 vs 77 months)
Schlaerth, 2009	20	103	27 vs 51	IA 11 vs 42	muc 11 vs 21, end 6 vs 37	gr1 14 vs 36	CT 8 vs 74	recurrence 3 vs 20, DOD 3 vs 17
[135]			(NS)	IB 0 vs 6	ser 1 vs 21, CC 1 vs 23	gr2 5 vs 36		84% vs 78% 5y RFS (NS)
				IC 9 vs 55	mixed 0 vs 1, na 1 vs 0	gr3 1 vs 20		84% vs 82% 5y OS (NS)
				(NS)	(NS)	na 0 vs 11 (NS)		(122 vs 113 months)
Yoshihara, 2019	21	82	36 (±4)	IA/IC1 18 vs 59	CC	gr3	CT 17 vs 72 (NS)	recurrence 3 vs 16, DOD 1 vs 14
[138]			vs 40 (±4)	IC2/IC3 3 vs 23				69% vs 72% 10y RFS (NS)
			(S)	(NS)				80% vs 70% 10y OS (NS)
								(56 months)
FSS fertility-sparing surgery; muc mucinous; end endometrioid; ser serous; CC clear cell; OMT omentectomy; LND lymph node dissection; CT adjuvant chemotherapy; DOD died of disease;
RFS recurrence-free survival; OS overall survival; DSS disease specific survival; NR not reported; na not available; nos not otherwise specified; S significant; NS not significant; ± standard deviation;
§ International Federation of Gynecology and Obstetrics (FIGO) 1988 or 2014 staging for ovarian cancer.

[truncated: 1 more sheets: Table S11 Endometrium]
